# Supplementary material
Source: MDPI journal article supplement (https://www.mdpi.com/1999-4907/15/3/410)
Supplement: s1 [file s1]

## SUPPORTING INFORMATION

**Table S1. Basic location information of plots in the Nanling National Nature Reserve, southern China.**

| Plot   | vegetation type | longitude   | latitude    | altitude(m) | mnt(°C) | mnp(mm) | min_JAN(°C) | max_JU(°C) | slope | sn_aspect | we_aspect | TPI     | TRI    |
|--------|-----------------|-------------|-------------|-------------|---------|---------|-------------|------------|-------|-----------|-----------|---------|--------|
| NL05R1 | DWF             | 112.991861  | 24.9271     | 1698        | 12.81   | 1977.67 | 0           | 25         | 0.28  | -0.28     | 0.96      | -29     | 46.25  |
| NL05R2 | DWF             | 112.991713  | 24.926655   | 1691        | 12.81   | 1977.67 | 0           | 25         | 0.24  | -0.28     | 0.96      | -57.625 | 59.125 |
| NL05R3 | DWF             | 112.990807  | 24.92682    | 1687        | 12.81   | 1977.67 | 0           | 25         | 0.14  | -0.62     | 0.79      | 80.125  | 80.125 |
| NL06R1 | EMF             | 112.970663  | 24.915195   | 1360        | 14.81   | 1835.00 | 2           | 27         | 0.37  | -0.06     | -1.00     | -41.25  | 64.75  |
| NL06R2 | EMF             | 112.968695  | 24.914674   | 1504        | 14.81   | 1835.00 | 2           | 27         | 0.20  | -0.78     | -0.62     | -0.875  | 34.875 |
| NL06R3 | EMF             | 112.969294  | 24.914571   | 1398        | 14.81   | 1835.00 | 2           | 27         | 0.20  | -0.78     | -0.62     | -0.875  | 34.875 |
| NL07R1 | EMF             | 113.028596  | 24.894103   | 1360        | 14.75   | 1856.33 | 2           | 27         | 0.11  | 0.96      | 0.29      | 36.5    | 38.25  |
| NL07R2 | EMF             | 113.029578  | 24.895416   | 1388        | 14.08   | 1886.00 | 1           | 26         | 0.28  | 0.58      | 0.82      | -37.75  | 62.75  |
| NL07R3 | EMF             | 113.026502  | 24.896219   | 1517        | 14.08   | 1886.00 | 1           | 26         | 0.19  | 0.29      | 0.96      | 14      | 25.5   |
| NL02   | MBF             | 113.0309057 | 24.94045031 | 1410        | 13.89   | 1900.67 | 1           | 26         | 0.31  | 1.00      | -0.04     | 26.5    | 68     |
| NL03   | MBF             | 113.0124064 | 24.93131868 | 1035        | 15.11   | 1820.00 | 2           | 27.33      | 0.25  | -0.96     | -0.29     | 1.5     | 45.75  |
| NL03R1 | MBF             | 113.011765  | 24.931699   | 1170        | 15.11   | 1820.00 | 2           | 27.33      | 0.09  | -0.98     | -0.18     | -67.875 | 67.875 |
| NL03R2 | MBF             | 113.011194  | 24.932324   | 1182        | 15.11   | 1820.00 | 2           | 27.33      | 0.09  | -0.98     | -0.18     | -67.875 | 67.875 |
| NL03R3 | MBF             | 113.007707  | 24.934903   | 1205        | 14.08   | 1906.67 | 1           | 26         | 0.21  | -1.00     | 0.00      | 45.25   | 64.5   |
| NL08R1 | MBF             | 112.962969  | 24.87281    | 920         | 16.03   | 1744.33 | 3           | 29         | 0.13  | 0.92      | -0.39     | -40.625 | 40.625 |
| NL08R2 | MBF             | 112.963612  | 24.87338    | 918         | 16.03   | 1744.33 | 3           | 29         | 0.11  | 0.38      | -0.93     | -23.25  | 36.25  |
| NL08R3 | MBF             | 112.961438  | 24.872592   | 925         | 16.03   | 1744.33 | 3           | 29         | 0.14  | 1.00      | 0.08      | -30.5   | 30.5   |
| NL01   | VBF             | 113.082721  | 24.919878   | 544         | 17.33   | 1621.67 | 4           | 30         | 0.34  | 0.98      | -0.19     | -56.875 | 67.875 |
| NL01R1 | VBF             | 112.746567  | 24.921856   | 843         | 15.83   | 1744.33 | 2           | 28         | 0.40  | 1.00      | 0.03      | 4.25    | 71.75  |
| NL01R2 | VBF             | 112.745843  | 24.922182   | 839         | 15.83   | 1744.33 | 2           | 28         | 0.40  | 1.00      | 0.03      | 4.25    | 71.75  |
| NL01R3 | VBF             | 112.745326  | 24.922053   | 842         | 15.83   | 1744.33 | 2           | 28         | 0.45  | 1.00      | 0.00      | -4.125  | 83.375 |
| NL02R1 | VBF             | 112.7947    | 24.836247   | 413         | 18.47   | 1615.00 | 5           | 31         | 0.19  | -0.43     | -0.90     | -15     | 39.75  |

|        |     |            |           |     |       |         |   |    |      |       |       |     |       |
|--------|-----|------------|-----------|-----|-------|---------|---|----|------|-------|-------|-----|-------|
| NL02R2 | VBF | 112.795231 | 24.836617 | 421 | 18.47 | 1615.00 | 5 | 31 | 0.19 | -0.43 | -0.90 | -15 | 39.75 |
| NL02R3 | VBF | 112.795225 | 24.83709  | 439 | 18.47 | 1615.00 | 5 | 31 | 0.19 | -0.43 | -0.90 | -15 | 39.75 |

---

**Table S2. Allometric growth equation of different plants in Nanling.**

| Category                                                                 | Formula    | Organs | Model coefficient |          | Statistical information |                | Range of application<br>(cm) | Reference          |
|--------------------------------------------------------------------------|------------|--------|-------------------|----------|-------------------------|----------------|------------------------------|--------------------|
|                                                                          |            |        | <i>a</i>          | <i>b</i> | r[p]                    | R <sup>2</sup> |                              |                    |
| <i>Cunninghamia lanceolata</i>                                           | $W = aD^b$ | Stem   | 0.0556            | 2.3579   |                         | 0.99           | D: 5~59                      | (Zhou et al. 2018) |
|                                                                          |            | Branch | 0.0198            | 2.1333   |                         | 0.99           |                              |                    |
|                                                                          |            | Leaves | 0.0700            | 1.5090   |                         | 0.98           |                              |                    |
|                                                                          |            | Root   | 0.3366            | 1.1952   |                         | 0.98           |                              |                    |
| <i>Schima superba</i>                                                    | $W = aD^b$ | Stem   | 0.0359            | 2.6733   |                         | 0.99           | D: 5~72                      | (Zhou et al. 2018) |
|                                                                          |            | Branch | 0.0730            | 1.9435   |                         | 0.99           |                              |                    |
|                                                                          |            | Leaves | 0.0141            | 2.0587   |                         | 0.99           |                              |                    |
|                                                                          |            | Root   | 0.0310            | 2.2582   |                         | 0.99           |                              |                    |
| <i>Liquidambar formosana</i>                                             | $W = aD^b$ | Stem   | 0.0726            | 2.5980   |                         | 0.99           | D: 5~64                      | (Zhou et al. 2018) |
|                                                                          |            | Branch | 0.0153            | 2.5437   |                         | 0.99           |                              |                    |
|                                                                          |            | Leaves | 0.0010            | 3.0161   |                         | 0.84           |                              |                    |
|                                                                          |            | Root   | 0.0256            | 2.6166   |                         | 0.97           |                              |                    |
| <i>Cyclobalanopsis glauca</i> ;<br><i>Cyclobalanopsis myrsinifolia</i> ; | $W = aD^b$ | Stem   | 0.1025            | 2.3764   |                         | 0.96           | D: 5~62                      | (Zhou et al. 2018) |
|                                                                          |            | Branch | 0.0320            | 2.3399   |                         | 0.98           |                              |                    |

|                                                                                          |            |        |        |        |      |         |                    |
|------------------------------------------------------------------------------------------|------------|--------|--------|--------|------|---------|--------------------|
| <i>Cyclobalanopsis poilanei</i>                                                          |            | Leaves | 0.0278 | 1.8434 | 0.93 |         |                    |
|                                                                                          |            | Root   | 0.0407 | 2.3376 | 0.99 |         |                    |
|                                                                                          |            | Stem   | 0.1870 | 2.0310 | 0.95 |         |                    |
| <i>Lithocarpus glaber;</i><br><i>Lithocarpus harlandii;</i><br><i>Lithocarpus hancei</i> | $W = aD^b$ | Branch | 0.0735 | 1.9800 | 0.98 | D: 5~44 | (Zhou et al. 2018) |
|                                                                                          |            | Leaves | 0.0230 | 1.9700 | 0.93 |         |                    |
|                                                                                          |            | Root   | 0.0750 | 2.0100 | 0.99 |         |                    |
|                                                                                          |            | Stem   | 0.2931 | 1.9700 | 0.88 |         |                    |
|                                                                                          |            | Branch | 0.0048 | 2.6300 | 0.82 |         |                    |
| <i>Pinus massoniana</i>                                                                  | $W = aD^b$ | Leaves | 0.0670 | 1.4600 | 0.91 | D: 5~74 | (Zhou et al. 2018) |
|                                                                                          |            | Root   | 0.0532 | 1.9800 | 0.99 |         |                    |
|                                                                                          |            | Stem   | 0.0250 | 2.7300 | 0.99 |         |                    |
|                                                                                          |            | Branch | 0.0020 | 3.0880 | 0.99 |         |                    |
|                                                                                          |            | Leaves | 0.0070 | 2.4470 | 0.98 |         |                    |
| <i>Cinnamomum camphora</i>                                                               | $W = aD^b$ | Root   | 0.0070 | 2.8190 | 0.99 | D: 5~66 | (Zhou et al. 2018) |
|                                                                                          |            | Stem   | 0.0686 | 2.2830 | 0.98 |         |                    |
|                                                                                          |            | Branch | 0.0788 | 1.9990 | 0.98 |         |                    |
|                                                                                          |            | Leaves | 0.0182 | 2.1764 | 0.98 |         |                    |
|                                                                                          |            | Branch | 0.0788 | 1.9990 | 0.98 |         |                    |
| <i>Castanopsis eyrei</i>                                                                 | $W = aD^b$ | Branch | 0.0788 | 1.9990 | 0.98 | D: 5~64 | (Zhou et al. 2018) |
|                                                                                          |            | Leaves | 0.0182 | 2.1764 | 0.98 |         |                    |

|                                  |                  |        |        |        |      |                                         |
|----------------------------------|------------------|--------|--------|--------|------|-----------------------------------------|
| <i>Fokienia hodginsii</i>        | $W = aD^b$       | Root   | 0.0436 | 2.1659 | 0.99 | (Zhou et al. 2018)                      |
|                                  |                  | Stem   | 0.0937 | 2.2225 | 0.99 |                                         |
|                                  |                  | Branch | 0.0323 | 2.3338 | 0.99 |                                         |
|                                  |                  | Leaves | 0.0236 | 2.3106 | 0.99 |                                         |
| <i>Nothotsuga longibracteata</i> | $W = aD^b$       | Root   | 0.0570 | 2.1651 | 0.99 | (Zhou et al. 2018)                      |
|                                  |                  | Stem   | 0.1909 | 1.9859 | 0.99 |                                         |
|                                  |                  | Branch | 0.0205 | 2.2230 | 0.99 |                                         |
|                                  |                  | Leaves | 0.0453 | 1.8432 | 0.99 |                                         |
| <i>Betula luminifera</i>         | $W = aD^b$       | Root   | 0.0223 | 2.3840 | 0.99 | (Zhou et al. 2018)                      |
|                                  |                  | Stem   | 0.1555 | 2.2273 | 0.99 |                                         |
|                                  |                  | Branch | 0.0134 | 2.4932 | 0.99 |                                         |
|                                  |                  | Leaves | 0.0092 | 2.0967 | 0.99 |                                         |
| <i>Cryptocarya chinensis</i>     | $W = a (D^2H)^b$ | Root   | 0.0242 | 2.4750 | 0.99 | >0.90<br>D: 0.8~19<br>(Luo et al. 2015) |
|                                  |                  | Stem   | 0.1776 | 0.8714 |      |                                         |
|                                  |                  | Branch | 0.0386 | 0.9105 |      |                                         |
|                                  |                  | Leaves | 0.0112 | 0.7983 |      |                                         |
|                                  |                  | Root   | 0.0694 | 0.9639 |      |                                         |

|                                 |            |        |         |        |        |             |                   |
|---------------------------------|------------|--------|---------|--------|--------|-------------|-------------------|
| <i>Castanopsis lamontii</i>     | $W = aD^b$ | Stem   | 0.1178  | 2.3426 | 0.99   | D: 5.8~31.7 | (Zuo et al. 2015) |
|                                 |            | Branch | 0.0025  | 3.0512 | 0.89   |             |                   |
|                                 |            | Leaves | 0.0015  | 3.2150 | 0.91   |             |                   |
|                                 |            | Root   | 0.0265  | 2.5053 | 0.88   |             |                   |
| <i>Castanopsis fissa</i>        | $W = aD^b$ | Stem   | 0.1530  | 2.2007 |        |             | (Ma 2020)         |
|                                 |            | Branch | 0.0117  | 2.7605 |        |             |                   |
|                                 |            | Leaves | 0.0133  | 2.3320 |        |             |                   |
|                                 |            | Root   | 0.0255  | 2.3650 |        |             |                   |
| <i>Engelhardia roxburghiana</i> | $W = aD^b$ | Stem   | 0.7353  | 1.6369 | 0.9720 | D: 8~28     | (Luo et al. 2015) |
|                                 |            | Branch | 3.9E-04 | 3.9931 | 0.9660 |             |                   |
|                                 |            | Leaves | 0.0014  | 3.1161 | 0.8190 |             |                   |
|                                 |            | Root   | 7.7E-04 | 3.6203 | 0.9860 |             |                   |
| <i>Castanopsis tibetana</i>     | $W = aD^b$ | Stem   | 0.1915  | 2.0980 | 0.96   | D: 5.2~31.7 | (Zuo et al. 2015) |
|                                 |            | Branch | 0.0047  | 2.7655 | 0.93   |             |                   |
|                                 |            | Leaves | 0.0056  | 2.7888 | 0.90   |             |                   |
|                                 |            | Root   | 0.0366  | 2.3897 | 0.95   |             |                   |
| <i>Daphniphyllum oldhami</i>    | $W = aD^b$ | Stem   | 0.1369  | 2.3000 | 0.94   | D: 5.9~17.2 | (Zuo et al. 2015) |

|                    |           |            |        |        |        |      |                               |
|--------------------|-----------|------------|--------|--------|--------|------|-------------------------------|
| Broad-leaved trees | DBH < 5cm | $W = aD^b$ | Branch | 0.0061 | 2.6251 | 0.84 | D: <5<br>(Zhou et al. 2018)   |
|                    |           |            | Leaves | 0.0018 | 3.0804 | 0.84 |                               |
|                    |           |            | Root   | 0.0286 | 2.3983 | 0.92 |                               |
|                    |           |            | Stem   | 0.0500 | 2.5669 | 0.99 |                               |
|                    |           |            | Branch | 0.0453 | 2.0341 | 0.99 |                               |
|                    | DBH ≥ 5cm | $W = aD^b$ | Leaves | 0.0138 | 2.1576 | 0.99 |                               |
|                    |           |            | Root   | 0.0529 | 1.5822 | 0.99 |                               |
|                    |           |            | Stem   | 0.0763 | 2.5022 | 0.94 |                               |
|                    |           |            | Branch | 0.0189 | 2.4996 | 0.78 |                               |
|                    |           |            | Leaves | 0.0080 | 2.6528 | 0.80 |                               |
| Coniferous trees   | DBH < 5cm | $W = aD^b$ | Root   | 0.0067 | 2.8327 | 0.98 | D: 5~65<br>(Zhou et al. 2018) |
|                    |           |            | Stem   | 0.1100 | 2.1680 | 0.99 |                               |
|                    |           |            | Branch | 0.0190 | 2.2930 | 0.99 |                               |
|                    |           |            | Leaves | 0.0700 | 1.6640 | 0.99 |                               |
|                    | DBH ≥ 5cm | $W = aD^b$ | Root   | 0.0820 | 1.8260 | 0.99 |                               |
|                    |           |            | Stem   | 0.0542 | 2.5449 | 0.89 |                               |
|                    |           |            | Branch | 0.0097 | 2.6923 | 0.81 |                               |

---

|        |        |        |      |
|--------|--------|--------|------|
| Leaves | 0.0302 | 2.0212 | 0.62 |
| Root   | 0.0551 | 2.0671 | 0.73 |

**Table S3. Pearson correlation coefficients of environmental and biodiversity indices.**

|                   | mnp   | min_<br>JAN | slope | sn_<br>aspec<br>t | we_<br>aspec<br>t | TPI   | TRI   | DS    | J     | S     | pd    | mpd   | mntd  | FEve  | FDiv  | FDis  | CW<br>M.st<br>n | CW<br>M.st<br>p | CW<br>M.st<br>k | CW<br>M.sg<br>c | CW<br>M.ltc | CW<br>M.ltn | CW<br>M.rtc | CW<br>M.rt<br>n | CW<br>M.rg<br>c | CW<br>M.rg<br>c |
|-------------------|-------|-------------|-------|-------------------|-------------------|-------|-------|-------|-------|-------|-------|-------|-------|-------|-------|-------|-----------------|-----------------|-----------------|-----------------|-------------|-------------|-------------|-----------------|-----------------|-----------------|
| mnp               | 1     | -0.96       | -0.07 | -0.21             | 0.70              | 0.28  | 0.19  | -0.14 | -0.14 | 0.06  | 0.22  | 0.48  | 0.25  | -0.02 | 0.17  | 0.44  | -0.09           | 0.24            | -0.11           | 0.10            | 0.46        | 0.07        | 0.57        | -0.19           | -0.35           | -0.24           |
| min_<br>JAN       | -0.96 | 1           | -0.12 | 0.06              | -0.77             | -0.27 | -0.35 | 0.02  | -0.01 | -0.12 | -0.29 | -0.47 | -0.19 | -0.03 | -0.26 | -0.29 | 0.01            | -0.25           | 0.11            | -0.09           | -0.48       | -0.18       | -0.61       | 0.10            | 0.29            | 0.20            |
| slope             | -0.07 | -0.12       | 1     | 0.44              | 0.08              | 0.04  | 0.52  | 0.09  | 0.23  | -0.04 | 0.00  | 0.09  | 0.00  | 0.29  | 0.11  | -0.38 | 0.12            | 0.29            | 0.11            | 0.00            | 0.12        | 0.16        | 0.15        | 0.24            | 0.11            | -0.17           |
| sn_<br>aspec<br>t | -0.21 | 0.06        | 0.44  | 1                 | 0.18              | 0.02  | 0.11  | 0.09  | 0.14  | -0.06 | 0.05  | 0.25  | -0.25 | 0.25  | 0.30  | -0.21 | -0.05           | -0.22           | 0.00            | -0.59           | -0.16       | 0.00        | 0.00        | -0.13           | 0.00            | -0.20           |
| we_<br>aspec<br>t | 0.70  | -0.77       | 0.08  | 0.18              | 1                 | 0.18  | 0.23  | 0.12  | 0.14  | 0.12  | 0.25  | 0.34  | 0.32  | -0.12 | 0.30  | 0.15  | 0.11            | 0.27            | -0.23           | -0.02           | 0.43        | 0.25        | 0.60        | 0.03            | 0.06            | 0.13            |
| TPI               | 0.28  | -0.27       | 0.04  | 0.02              | 0.18              | 1     | 0.04  | 0.25  | 0.29  | 0.13  | 0.15  | 0.01  | -0.07 | 0.09  | -0.01 | 0.25  | -0.13           | 0.08            | -0.18           | 0.19            | 0.22        | -0.07       | 0.11        | -0.09           | -0.03           | -0.02           |
| TRI               | 0.19  | -0.35       | 0.52  | 0.11              | 0.23              | 0.04  | 1     | 0.26  | 0.35  | 0.10  | 0.08  | 0.04  | -0.15 | 0.01  | 0.29  | -0.34 | 0.16            | -0.13           | -0.16           | 0.17            | 0.19        | 0.17        | 0.26        | 0.19            | -0.15           | 0.10            |
| DS                | -0.14 | 0.02        | 0.09  | 0.09              | 0.12              | 0.25  | 0.26  | 1     | 0.96  | 0.76  | 0.65  | 0.05  | -0.45 | 0.08  | 0.07  | -0.21 | 0.63            | -0.15           | -0.07           | 0.15            | 0.10        | 0.41        | -0.06       | 0.62            | 0.31            | 0.40            |
| J                 | -0.14 | -0.01       | 0.23  | 0.14              | 0.14              | 0.29  | 0.35  | 0.96  | 1     | 0.67  | 0.58  | 0.04  | -0.38 | 0.20  | 0.06  | -0.30 | 0.58            | -0.08           | -0.02           | 0.18            | 0.12        | 0.41        | -0.05       | 0.61            | 0.27            | 0.31            |
| S                 | 0.06  | -0.12       | -0.04 | -0.06             | 0.12              | 0.13  | 0.10  | 0.76  | 0.67  | 1     | 0.91  | 0.12  | -0.36 | -0.04 | -0.24 | 0.06  | 0.50            | 0.09            | -0.14           | 0.11            | 0.24        | 0.36        | 0.11        | 0.55            | 0.21            | 0.08            |
| pd                | 0.22  | -0.29       | 0.00  | 0.05              | 0.25              | 0.15  | 0.08  | 0.65  | 0.58  | 0.91  | 1     | 0.42  | -0.16 | 0.06  | -0.32 | 0.25  | 0.33            | 0.09            | -0.09           | 0.08            | 0.30        | 0.16        | 0.19        | 0.33            | 0.01            | -0.08           |



[illegible]

[illegible]

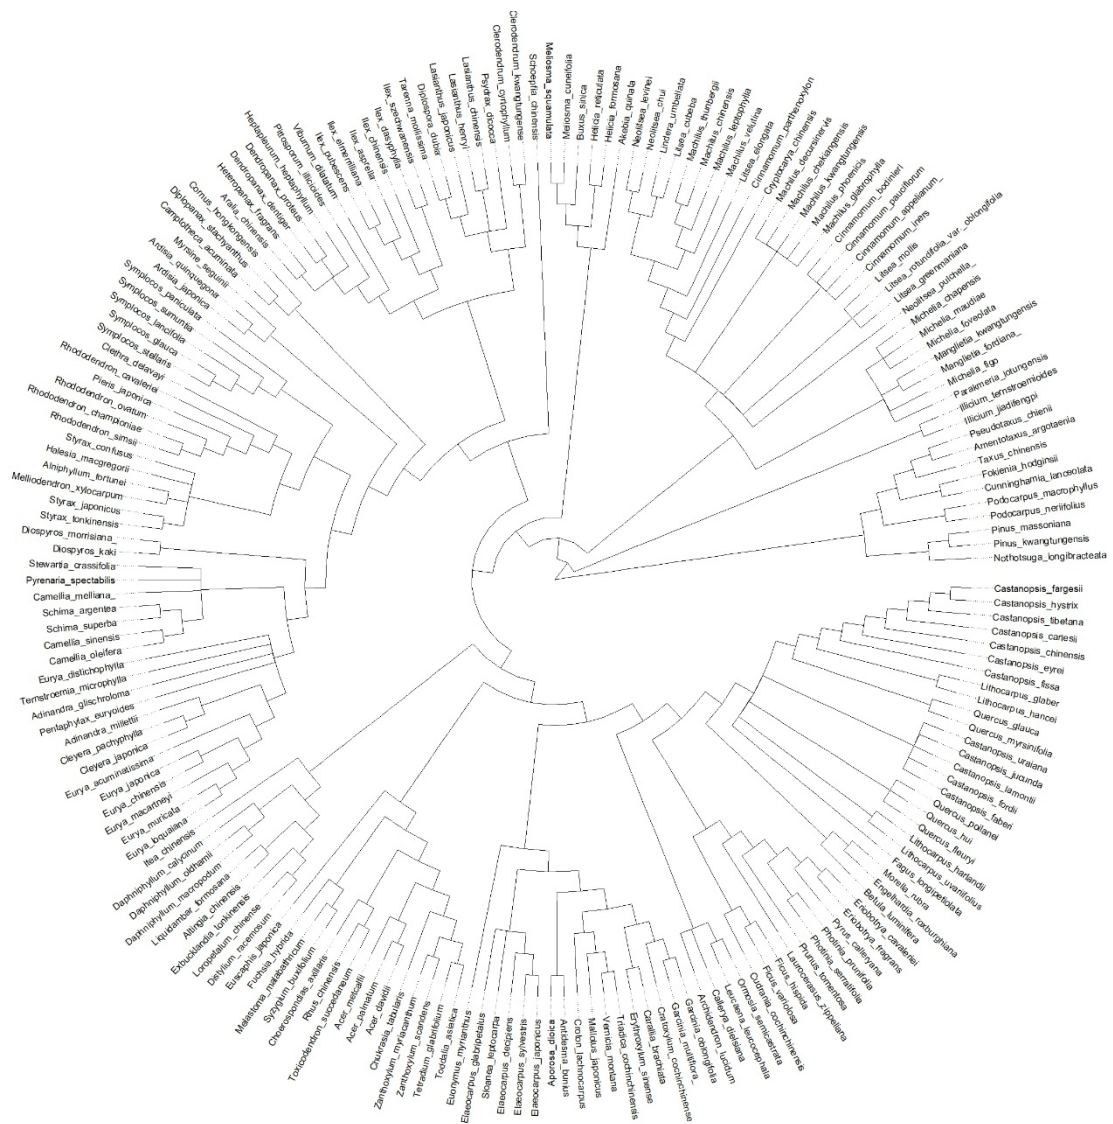

**Figure S1.** Phylogenetic tree of the 201 species in this study.

## References

1. Luo Y.; Wang X.; Lu F. Manual of major forest tree biomass models in China. Beijing: China Forestry Press, 2015.
2. Ma Z. Carbon reserves and its influence factors of Castanopsis forest in Guangzhou. Chinese Academy of Forestry Sciences, 2020.
3. Zhou G.; Yin G.; Tang X. Carbon reserves of forest ecosystem in China: biomass equation. Beijing: Science Press, 2018.
4. Zuo S.; Ren Y.; Weng X.; Ding H.; Luo Y. Biomass relative growth model of nine common tree species in subtropical evergreen broad-leaved forest. Chinese Journal of Applied Ecology, 2015,26 (02): 356-362.
